# Supplementary material
Source: MDPI journal article supplement (https://www.mdpi.com/2072-4292/5/10/4753)
Supplement: s1 [file s1]

## Supplementary Information

# Damage to Buildings in Large Slope Rock Instabilities Monitored with the PSInSAR™ Technique. *Remote Sens.* 2013, 5, 4753–4773

Paolo Frattini <sup>1,\*</sup>, Giovanni B. Crosta <sup>1</sup> and Jacopo Allievi <sup>2</sup>

<sup>1</sup> Department of Earth and Environmental Sciences, Università degli Studi di Milano-Bicocca, p.zza della Scienza 4, 20126 Milan, Italy; E-Mail: giovannibattista.crosta@unimib.it

<sup>2</sup> Tele-Rilevamento Europa T.R.E., Ripa di Porta Ticinese 79, 20143 Milan, Italy; E-Mail: jacopo.allievi@treuropa.com

\* Author to whom correspondence should be addressed; E-Mail: paolo.frattini@unimib.it; Tel.: +39-02-6448-2005; Fax: +39-02-6448-2073.

This supplementary material supports the main text as follows:

**Table S1.** LcED.

| Track 208       |            |           |         |       | Track 480          |                  |             |            |          |
|-----------------|------------|-----------|---------|-------|--------------------|------------------|-------------|------------|----------|
| Descending Mode |            |           |         |       | Descending Mode    |                  |             |            |          |
| # Scene         | Data       | Satellite | Bn      | Bt    | # Scene            | Data             | Satellite   | Bn         | Bt       |
| 1               | 5/16/1992  | ERS1      | −632.8  | −2299 | 1                  | 4/30/1992        | ERS1        | −903.1     | −1179    |
| 2               | 6/20/1992  | ERS1      | −722.5  | −2264 | 2                  | 6/4/1992         | ERS1        | 66.0       | −1144    |
| 3               | 7/25/1992  | ERS1      | 41.7    | −2229 | 3                  | 8/13/1992        | ERS1        | −784.0     | −1074    |
| 4               | 8/29/1992  | ERS1      | −21.1   | −2194 | 4                  | 10/22/1992       | ERS1        | −393.4     | −1004    |
| 5               | 10/3/1992  | ERS1      | 424.8   | −2159 | 5                  | 11/26/1992       | ERS1        | 527.8      | −969     |
| 6               | 11/7/1992  | ERS1      | 441.8   | −2124 | 6                  | 12/31/1992       | ERS1        | −647.3     | −934     |
| 7               | 12/12/1992 | ERS1      | 266.2   | −2089 | 7                  | 2/4/1993         | ERS1        | −930.6     | −899     |
| 8               | 1/16/1993  | ERS1      | −223.2  | −2054 | 8                  | 6/24/1993        | ERS1        | −239.0     | −759     |
| 9               | 3/27/1993  | ERS1      | 203.6   | −1984 | 9                  | 11/11/1993       | ERS1        | −43.7      | −619     |
| 10              | 5/1/1993   | ERS1      | 649.2   | −1949 | 10                 | 12/16/1993       | ERS1        | 846.4      | −584     |
| 11              | 7/10/1993  | ERS1      | −1136.2 | −1879 | 11                 | 5/13/1995        | ERS1        | −807.5     | −71      |
| 12              | 9/18/1993  | ERS1      | 373.6   | −1809 | 12                 | 6/17/1995        | ERS1        | −271.6     | −36      |
| 13              | 11/27/1993 | ERS1      | 634.4   | −1739 | 13                 | 6/18/1995        | ERS2        | −392.8     | −35      |
| 14              | 4/24/1995  | ERS1      | −494.2  | −1226 | 14                 | 7/22/1995        | ERS1        | 34.9       | −1       |
| 15              | 5/29/1995  | ERS1      | −281.4  | −1191 | <b>15 (master)</b> | <b>7/23/1995</b> | <b>ERS2</b> | <b>0.0</b> | <b>0</b> |
| 16              | 5/30/1995  | ERS2      | −356.4  | −1190 | 16                 | 8/26/1995        | ERS1        | −134.4     | 34       |
| 17              | 8/8/1995   | ERS2      | −33.9   | −1120 | 17                 | 8/27/1995        | ERS2        | −185.5     | 35       |
| 18              | 9/11/1995  | ERS1      | −946.2  | −1086 | 18                 | 9/30/1995        | ERS1        | 209.1      | 69       |

Table S1. *Cont.*

| Track 208          |                 |             |            |          | Track 480       |            |           |        |        |
|--------------------|-----------------|-------------|------------|----------|-----------------|------------|-----------|--------|--------|
| Descending Mode    |                 |             |            |          | Descending Mode |            |           |        |        |
| # Scene            | Data            | Satellite   | Bn         | Bt       | # Scene         | Data       | Satellite | Bn     | Bt     |
| 19                 | 9/12/1995       | ERS2        | -893.7     | -1085    | 19              | 10/1/1995  | ERS2      | 583.0  | 70     |
| 20                 | 10/17/1995      | ERS2        | 828.8      | -1050    | 20              | 11/5/1995  | ERS2      | 357.0  | 105    |
| 21                 | 11/20/1995      | ERS1        | -1088.5    | -1016    | 21              | 12/9/1995  | ERS1      | 206.1  | 139    |
| 22                 | 11/21/1995      | ERS2        | -1107.0    | -1015    | 22              | 12/10/1995 | ERS2      | 84.2   | 140    |
| 23                 | 12/25/1995      | ERS1        | 423.1      | -981     | 23              | 1/13/1996  | ERS1      | 35.2   | 174    |
| 24                 | 12/26/1995      | ERS2        | 220.7      | -980     | 24              | 1/14/1996  | ERS2      | -55.1  | 175    |
| 25                 | 3/4/1996        | ERS1        | 369.5      | -911     | 25              | 2/17/1996  | ERS1      | 474.5  | 209    |
| 26                 | 3/5/1996        | ERS2        | 403.6      | -910     | 26              | 2/18/1996  | ERS2      | 557.4  | 210    |
| 27                 | 4/8/1996        | ERS1        | -28.8      | -876     | 27              | 3/23/1996  | ERS1      | -991.9 | 244    |
| 28                 | 4/9/1996        | ERS2        | -104.3     | -875     | 28              | 4/27/1996  | ERS1      | 608.7  | 279    |
| 29                 | 5/14/1996       | ERS2        | 53.0       | -840     | 29              | 4/28/1996  | ERS2      | 514.1  | 280    |
| 30                 | 6/18/1996       | ERS2        | -384.9     | -805     | 30              | 6/1/1996   | ERS1      | -500.2 | 314    |
| 31                 | 7/22/1996       | ERS1        | 320.5      | -771     | 31              | 6/2/1996   | ERS2      | -562.2 | 315    |
| 32                 | 7/23/1996       | ERS2        | 140.4      | -770     | 32              | 7/7/1996   | ERS2      | -91.0  | 350    |
| 33                 | 10/1/1996       | ERS2        | -336.9     | -700     | 33              | 8/11/1996  | ERS2      | 494.0  | 385    |
| 34                 | 11/5/1996       | ERS2        | 912.4      | -665     | 34              | 9/15/1996  | ERS2      | -205.3 | 420    |
| 35                 | 1/14/1997       | ERS2        | -72.8      | -595     | 35              | 10/20/1996 | ERS2      | 494.0  | 455    |
| 36                 | 2/18/1997       | ERS2        | -497.5     | -560     | 36              | 11/24/1996 | ERS2      | 903.6  | 490    |
| 37                 | 3/25/1997       | ERS2        | -59.9      | -525     | 37              | 12/29/1996 | ERS2      | -125.9 | 525    |
| 38                 | 4/29/1997       | ERS2        | -579.1     | -490     | 38              | 2/2/1997   | ERS2      | 233.5  | 560    |
| 39                 | 6/3/1997        | ERS2        | -474.1     | -455     | 39              | 3/9/1997   | ERS2      | -65.8  | 595    |
| 40                 | 7/8/1997        | ERS2        | -322.5     | -420     | 40              | 4/13/1997  | ERS2      | 584.6  | 630    |
| 41                 | 10/21/1997      | ERS2        | -150.4     | -315     | 41              | 5/18/1997  | ERS2      | -150.3 | 665    |
| 42                 | 11/25/1997      | ERS2        | 168.1      | -280     | 42              | 7/27/1997  | ERS2      | -14.0  | 735    |
| 43                 | 12/30/1997      | ERS2        | -155.8     | -245     | 43              | 8/31/1997  | ERS2      | 317.7  | 770    |
| 44                 | 2/3/1998        | ERS2        | -178.4     | -210     | 44              | 10/5/1997  | ERS2      | 207.0  | 805    |
| 45                 | 3/10/1998       | ERS2        | -616.1     | -175     | 45              | 11/9/1997  | ERS2      | -412.9 | 840    |
| 46                 | 4/14/1998       | ERS2        | -122.0     | -140     | 46              | 12/14/1997 | ERS2      | -586.2 | 875    |
| 47                 | 5/19/1998       | ERS2        | 215.0      | -105     | 47              | 2/22/1998  | ERS2      | -385.9 | 945    |
| 48                 | 6/23/1998       | ERS2        | 253.1      | -70      | 48              | 3/29/1998  | ERS2      | -110.0 | 980    |
| 49                 | 7/28/1998       | ERS2        | -293.6     | -35      | 49              | 5/3/1998   | ERS2      | 291.6  | 1015   |
| <b>50 (master)</b> | <b>9/1/1998</b> | <b>ERS2</b> | <b>0.0</b> | <b>0</b> | 50              | 6/7/1998   | ERS2      | 1027.5 | 1050,0 |
| 51                 | 10/6/1998       | ERS2        | 387.0      | 35       | 51              | 7/12/1998  | ERS2      | -620.4 | 1085,0 |
| 52                 | 12/15/1998      | ERS2        | -905.3     | 105      | 52              | 8/16/1998  | ERS2      | -275.2 | 1120,0 |
| 53                 | 1/19/1999       | ERS2        | -65.2      | 140      | 53              | 9/20/1998  | ERS2      | -389.9 | 1155,0 |
| 54                 | 2/22/1999       | ERS1        | 1051.6     | 174      | 54              | 10/25/1998 | ERS2      | 163.3  | 1190,0 |
| 55                 | 2/23/1999       | ERS2        | 772.6      | 175      | 55              | 3/14/1999  | ERS2      | -163.1 | 1330,0 |
| 56                 | 3/29/1999       | ERS1        | -816.5     | 209      | 56              | 4/18/1999  | ERS2      | 435.2  | 1365,0 |
| 57                 | 3/30/1999       | ERS2        | -869.0     | 210      | 57              | 5/23/1999  | ERS2      | -10.2  | 1400,0 |
| 58                 | 5/3/1999        | ERS1        | 130.3      | 244      | 58              | 6/26/1999  | ERS1      | 350.9  | 1434,0 |
| 59                 | 5/4/1999        | ERS2        | 67.9       | 245      | 59              | 6/27/1999  | ERS2      | 242.8  | 1435,0 |
| 60                 | 6/7/1999        | ERS1        | 294.4      | 279      | 60              | 7/31/1999  | ERS1      | 401.6  | 1469,0 |

Table S1. *Cont.*

| Track 208       |            |           |         |      | Track 480       |            |           |        |        |
|-----------------|------------|-----------|---------|------|-----------------|------------|-----------|--------|--------|
| Descending Mode |            |           |         |      | Descending Mode |            |           |        |        |
| # Scene         | Data       | Satellite | Bn      | Bt   | # Scene         | Data       | Satellite | Bn     | Bt     |
| 61              | 6/8/1999   | ERS2      | 173.7   | 280  | 61              | 8/1/1999   | ERS2      | 178.6  | 1470,0 |
| 62              | 7/13/1999  | ERS2      | -40.5   | 315  | 62              | 9/4/1999   | ERS1      | -319.6 | 1504,0 |
| 63              | 9/21/1999  | ERS2      | 32.0    | 385  | 63              | 9/5/1999   | ERS2      | -565.5 | 1505,0 |
| 64              | 11/30/1999 | ERS2      | -585.8  | 455  | 64              | 10/9/1999  | ERS1      | -541.0 | 1539,0 |
| 65              | 1/4/2000   | ERS2      | 7.3     | 490  | 65              | 10/10/1999 | ERS2      | -758.3 | 1540,0 |
| 66              | 3/14/2000  | ERS2      | -840.6  | 560  | 66              | 11/14/1999 | ERS2      | 247.1  | 1575,0 |
| 67              | 4/18/2000  | ERS2      | 272.9   | 595  | 67              | 12/19/1999 | ERS2      | -44.9  | 1610,0 |
| 68              | 5/23/2000  | ERS2      | 803.9   | 630  | 68              | 1/23/2000  | ERS2      | -18.6  | 1645,0 |
| 69              | 6/27/2000  | ERS2      | -713.8  | 665  | 69              | 2/26/2000  | ERS1      | -597.5 | 1679,0 |
| 70              | 8/1/2000   | ERS2      | -1011.4 | 700  | 70              | 2/27/2000  | ERS2      | -513.0 | 1680,0 |
| 71              | 9/5/2000   | ERS2      | -113.6  | 735  | 71              | 5/7/2000   | ERS2      | 544.0  | 1750,0 |
| 72              | 11/14/2000 | ERS2      | -111.8  | 805  | 72              | 6/11/2000  | ERS2      | -545.7 | 1785,0 |
| 73              | 12/19/2000 | ERS2      | -26.0   | 840  | 73              | 7/16/2000  | ERS2      | -633.6 | 1820,0 |
| 74              | 9/25/2001  | ERS2      | 39.6    | 1120 | 74              | 8/20/2000  | ERS2      | -16.2  | 1855,0 |
| 75              | 1/8/2002   | ERS2      | -396.7  | 1225 | 75              | 9/24/2000  | ERS2      | 409.6  | 1890,0 |
| 76              | 5/28/2002  | ERS2      | -145.5  | 1365 | 76              | 10/29/2000 | ERS2      | 102.9  | 1925,0 |
| 77              | 7/2/2002   | ERS2      | -37.2   | 1400 | 77              | 12/3/2000  | ERS2      | 274.1  | 1960,0 |
| 78              | 9/10/2002  | ERS2      | 272.3   | 1470 | 78              | 1/7/2001   | ERS2      | -381.4 | 1995,0 |
| 79              | 10/15/2002 | ERS2      | -22.7   | 1505 | 79              | 8/5/2001   | ERS2      | 924.3  | 2205,0 |
| 80              | 12/24/2002 | ERS2      | -845.5  | 1575 | 80              | 8/25/2002  | ERS2      | -792.2 | 2590,0 |
|                 |            |           |         |      | 81              | 12/8/2002  | ERS2      | -929.3 | 2695,0 |
|                 |            |           |         |      | 82              | 1/12/2003  | ERS2      | 243.4  | 2730,0 |

Table S2. LED.

| Track 208       |            |           |         |       |                    |                  |             |            |          |
|-----------------|------------|-----------|---------|-------|--------------------|------------------|-------------|------------|----------|
| Descending Mode |            |           |         |       |                    |                  |             |            |          |
| # Scene         | Data       | Satellite | Bn      | Bt    | # Scene            | Data             | Satellite   | Bn         | Bt       |
| 1               | 5/16/1992  | ERS1      | -579.6  | -1774 | 41                 | 2/18/1997        | ERS2        | -440.9     | -35      |
| 2               | 6/20/1992  | ERS1      | -666.3  | -1739 | <b>42 (master)</b> | <b>3/25/1997</b> | <b>ERS2</b> | <b>0.0</b> | <b>0</b> |
| 3               | 7/25/1992  | ERS1      | 94.1    | -1703 | 43                 | 4/29/1997        | ERS2        | -520.3     | 34       |
| 4               | 8/29/1992  | ERS1      | 34.4    | -1668 | 44                 | 6/3/1997         | ERS2        | -416.2     | 70       |
| 5               | 10/3/1992  | ERS1      | 482.7   | -1633 | 45                 | 7/8/1997         | ERS2        | -262.8     | 105      |
| 6               | 11/7/1992  | ERS1      | 502.8   | -1598 | 46                 | 8/12/1997        | ERS2        | 29.2       | 140      |
| 7               | 12/12/1992 | ERS1      | 332.1   | -1564 | 47                 | 10/21/1997       | ERS2        | -91.2      | 209      |
| 8               | 1/16/1993  | ERS1      | -168.5  | -1529 | 48                 | 11/25/1997       | ERS2        | 227.9      | 244      |
| 9               | 2/20/1993  | ERS1      | 376.9   | -1494 | 49                 | 12/30/1997       | ERS2        | -100.5     | 279      |
| 10              | 3/27/1993  | ERS1      | 267.9   | -1459 | 50                 | 2/3/1998         | ERS2        | -116.8     | 314      |
| 11              | 5/1/1993   | ERS1      | 712.4   | -1424 | 51                 | 3/10/1998        | ERS2        | -557.5     | 349      |
| 12              | 6/5/1993   | ERS1      | -959.7  | -1389 | 52                 | 4/14/1998        | ERS2        | -61.0      | 384      |
| 13              | 7/10/1993  | ERS1      | -1076.1 | -1354 | 53                 | 5/19/1998        | ERS2        | 276.4      | 419      |
| 14              | 8/14/1993  | ERS1      | -177.5  | -1318 | 54                 | 6/23/1998        | ERS2        | 314.3      | 454      |
| 15              | 9/18/1993  | ERS1      | 430.2   | -1283 | 55                 | 7/28/1998        | ERS2        | -237.6     | 489      |

**Table S2. Cont.**

| <b>Track 208</b>       |             |                  |           |           |                |             |                  |           |           |
|------------------------|-------------|------------------|-----------|-----------|----------------|-------------|------------------|-----------|-----------|
| <b>Descending Mode</b> |             |                  |           |           |                |             |                  |           |           |
| <b># Scene</b>         | <b>Data</b> | <b>Satellite</b> | <b>Bn</b> | <b>Bt</b> | <b># Scene</b> | <b>Data</b> | <b>Satellite</b> | <b>Bn</b> | <b>Bt</b> |
| 16                     | 10/23/1993  | ERS1             | 634.2     | -1249     | 56             | 9/1/1998    | ERS2             | 56.4      | 525       |
| 17                     | 11/27/1993  | ERS1             | 695.8     | -1214     | 57             | 10/6/1998   | ERS2             | 444.2     | 559       |
| 18                     | 4/24/1995   | ERS1             | -437.7    | -701      | 58             | 11/10/1998  | ERS2             | 668.3     | 594       |
| 19                     | 5/29/1995   | ERS1             | -225.2    | -665      | 59             | 12/15/1998  | ERS2             | -848.0    | 629       |
| 20                     | 5/30/1995   | ERS2             | -299.6    | -664      | 60             | 1/19/1999   | ERS2             | -7.6      | 664       |
| 21                     | 8/8/1995    | ERS2             | 23.5      | -594      | 61             | 2/22/1999   | ERS1             | 1113.6    | 698       |
| 22                     | 9/11/1995   | ERS1             | -885.5    | -560      | 62             | 2/23/1999   | ERS2             | 831.1     | 699       |
| 23                     | 9/12/1995   | ERS2             | -832.7    | -559      | 63             | 3/29/1999   | ERS1             | -757.8    | 733       |
| 24                     | 10/17/1995  | ERS2             | 882.7     | -524      | 64             | 3/30/1999   | ERS2             | -809.0    | 734       |
| 25                     | 11/20/1995  | ERS1             | -1028.6   | -490      | 65             | 5/3/1999    | ERS1             | 187.6     | 768       |
| 26                     | 11/21/1995  | ERS2             | -1047.0   | -489      | 66             | 5/4/1999    | ERS2             | 126.4     | 769       |
| 27                     | 12/25/1995  | ERS1             | 479.1     | -455      | 67             | 6/7/1999    | ERS1             | 352.5     | 803       |
| 28                     | 12/26/1995  | ERS2             | 277.8     | -454      | 68             | 6/8/1999    | ERS2             | 233.3     | 804       |
| 29                     | 3/4/1996    | ERS1             | 427.8     | -385      | 69             | 7/13/1999   | ERS2             | 20.1      | 839       |
| 30                     | 3/5/1996    | ERS2             | 463.3     | -384      | 70             | 8/17/1999   | ERS2             | 1102.6    | 874       |
| 31                     | 4/8/1996    | ERS1             | 27.8      | -350      | 71             | 9/21/1999   | ERS2             | 85.2      | 909       |
| 32                     | 4/9/1996    | ERS2             | -47.6     | -349      | 72             | 11/30/1999  | ERS2             | -520.1    | 979       |
| 33                     | 5/13/1996   | ERS1             | 248.2     | -315      | 73             | 1/4/2000    | ERS2             | 61.3      | 1014      |
| 34                     | 5/14/1996   | ERS2             | 109.6     | -314      | 74             | 3/14/2000   | ERS2             | -777.1    | 1084      |
| 35                     | 6/18/1996   | ERS2             | -323.8    | -279      | 75             | 4/18/2000   | ERS2             | 333.2     | 1119      |
| 36                     | 7/22/1996   | ERS1             | 379.0     | -245      | 76             | 5/23/2000   | ERS2             | 864.1     | 1154      |
| 37                     | 7/23/1996   | ERS2             | 200.4     | -244      | 77             | 6/27/2000   | ERS2             | -658.5    | 1189      |
| 38                     | 10/1/1996   | ERS2             | -276.5    | -174      | 78             | 8/1/2000    | ERS2             | -952.8    | 1225      |
| 39                     | 11/5/1996   | ERS2             | 968.0     | -139      | 79             | 9/5/2000    | ERS2             | -57.0     | 1260      |
| 40                     | 1/14/1997   | ERS2             | -13.5     | -70       | 80             | 11/14/2000  | ERS2             | -47.4     | 1330      |
|                        |             |                  |           |           | 81             | 12/19/2000  | ERS2             | 26.6      | 1365      |

**Table S3. LRD.**

| <b>Track 197</b>       |             |                  |           |           | <b>Track 297</b>       |             |                  |           |           |
|------------------------|-------------|------------------|-----------|-----------|------------------------|-------------|------------------|-----------|-----------|
| <b>Descending Mode</b> |             |                  |           |           | <b>Descending Mode</b> |             |                  |           |           |
| <b># Scene</b>         | <b>Data</b> | <b>Satellite</b> | <b>Bn</b> | <b>Bt</b> | <b># Scene</b>         | <b>Data</b> | <b>Satellite</b> | <b>Bn</b> | <b>Bt</b> |
| 1                      | 4/28/2003   | RSAT-S3          | -488.4    | -935      | 1                      | 4/11/2003   | RSAT-S3          | 45.6      | -887      |
| 2                      | 5/22/2003   | RSAT-S3          | 446.8     | -911      | 2                      | 5/5/2003    | RSAT-S3          | 48.4      | -863      |
| 3                      | 6/15/2003   | RSAT-S3          | 663.7     | -887      | 3                      | 5/29/2003   | RSAT-S3          | -83.8     | -839      |
| 4                      | 7/9/2003    | RSAT-S3          | -435.1    | -863      | 4                      | 6/22/2003   | RSAT-S3          | 521.2     | -815      |
| 5                      | 8/2/2003    | RSAT-S3          | 337.6     | -839      | 5                      | 7/16/2003   | RSAT-S3          | -123.2    | -791      |
| 6                      | 8/26/2003   | RSAT-S3          | 482.5     | -815      | 6                      | 8/9/2003    | RSAT-S3          | -259.7    | -767      |
| 7                      | 9/19/2003   | RSAT-S3          | 31.8      | -791      | 7                      | 9/2/2003    | RSAT-S3          | -33.9     | -743      |
| 8                      | 10/13/2003  | RSAT-S3          | -261.9    | -767      | 8                      | 9/26/2003   | RSAT-S3          | 131.6     | -719      |
| 9                      | 11/6/2003   | RSAT-S3          | -395.5    | -743      | 9                      | 10/20/2003  | RSAT-S3          | -1.1      | -695      |
| 10                     | 11/30/2003  | RSAT-S3          | 301.5     | -719      | 10                     | 11/13/2003  | RSAT-S3          | 195.6     | -671      |

Table S3. *Cont.*

|                   |                   |                |            |          |                   |                  |                |            |          |
|-------------------|-------------------|----------------|------------|----------|-------------------|------------------|----------------|------------|----------|
| 11                | 12/24/2003        | RSAT-S3        | 707.5      | -695     | 11                | 12/7/2003        | RSAT-S3        | -643.1     | -647     |
| 12                | 1/17/2004         | RSAT-S3        | -29.0      | -671     | 12                | 12/31/2003       | RSAT-S3        | 251.3      | -623     |
| 13                | 2/10/2004         | RSAT-S3        | 238.5      | -647     | 13                | 1/24/2004        | RSAT-S3        | 456.1      | -599     |
| 14                | 4/22/2004         | RSAT-S3        | -468.3     | -575     | 14                | 2/17/2004        | RSAT-S3        | -674.1     | -575     |
| 15                | 8/20/2004         | RSAT-S3        | 57.9       | -455     | 15                | 4/5/2004         | RSAT-S3        | 95.4       | -527     |
| 16                | 9/13/2004         | RSAT-S3        | 149.8      | -431     | 16                | 7/10/2004        | RSAT-S3        | -11.9      | -431     |
| 17                | 10/7/2004         | RSAT-S3        | -525.0     | -407     | 17                | 8/3/2004         | RSAT-S3        | -290.9     | -407     |
| 18                | 11/24/2004        | RSAT-S3        | 668.3      | -359     | 18                | 8/27/2004        | RSAT-S3        | -549.9     | -383     |
| 19                | 12/18/2004        | RSAT-S3        | -663.0     | -335     | 19                | 9/20/2004        | RSAT-S3        | -73.4      | -359     |
| 20                | 1/11/2005         | RSAT-S3        | 799.3      | -311     | 20                | 10/14/2004       | RSAT-S3        | -117.5     | -335     |
| 21                | 2/4/2005          | RSAT-S3        | 66.8       | -287     | 21                | 11/7/2004        | RSAT-S3        | -821.2     | -311     |
| 22                | 2/28/2005         | RSAT-S3        | -369.9     | -263     | 22                | 12/1/2004        | RSAT-S3        | 522.5      | -287     |
| 23                | 3/24/2005         | RSAT-S3        | 203.5      | -239     | 23                | 12/25/2004       | RSAT-S3        | 61.1       | -263     |
| 24                | 4/17/2005         | RSAT-S3        | 58.9       | -215     | 24                | 1/18/2005        | RSAT-S3        | 131.6      | -239     |
| 25                | 5/11/2005         | RSAT-S3        | 151.5      | -191     | 25                | 3/7/2005         | RSAT-S3        | -594.9     | -191     |
| 26                | 6/4/2005          | RSAT-S3        | 716.1      | -167     | 26                | 3/31/2005        | RSAT-S3        | -384.7     | -167     |
| 27                | 6/28/2005         | RSAT-S3        | 255.7      | -143     | 27                | 4/24/2005        | RSAT-S3        | 376.9      | -143     |
| 28                | 7/22/2005         | RSAT-S3        | 731.1      | -119     | 28                | 5/18/2005        | RSAT-S3        | -686.0     | -119     |
| 29                | 8/15/2005         | RSAT-S3        | -84.3      | -95      | 29                | 6/11/2005        | RSAT-S3        | 709.5      | -95      |
| 30                | 9/8/2005          | RSAT-S3        | 351.3      | -71      | 30                | 7/5/2005         | RSAT-S3        | -486.4     | -71      |
| 31                | 10/2/2005         | RSAT-S3        | -579.2     | -47      | 31                | 7/29/2005        | RSAT-S3        | 635.3      | -47      |
| <b>32(master)</b> | <b>11/19/2005</b> | <b>RSAT-S3</b> | <b>0.0</b> | <b>0</b> | 32                | 8/22/2005        | RSAT-S3        | -527.4     | -24      |
| 33                | 12/13/2005        | RSAT-S3        | -24.5      | 23       | <b>33(master)</b> | <b>9/15/2005</b> | <b>RSAT-S3</b> | <b>0.0</b> | <b>0</b> |
| 34                | 1/6/2006          | RSAT-S3        | 365.7      | 47       | 34                | 10/9/2005        | RSAT-S3        | -212.4     | 23       |
| 35                | 1/30/2006         | RSAT-S3        | 148.0      | 71       | 35                | 11/2/2005        | RSAT-S3        | -258.1     | 47       |
| 36                | 2/23/2006         | RSAT-S3        | -123.7     | 95       | 36                | 11/26/2005       | RSAT-S3        | 97.5       | 71       |
| 37                | 3/19/2006         | RSAT-S3        | 346.7      | 119      | 37                | 12/20/2005       | RSAT-S3        | -459.0     | 95       |
| 38                | 4/12/2006         | RSAT-S3        | -736.0     | 143      | 38                | 3/26/2006        | RSAT-S3        | 195.1      | 191      |
| 39                | 5/6/2006          | RSAT-S3        | 296.7      | 167      | 39                | 4/19/2006        | RSAT-S3        | -362.6     | 215      |
| 40                | 5/30/2006         | RSAT-S3        | 245.3      | 191      | 40                | 5/13/2006        | RSAT-S3        | -26.8      | 239      |
| 41                | 6/23/2006         | RSAT-S3        | 567.2      | 215      | 41                | 6/6/2006         | RSAT-S3        | 464.3      | 263      |
| 42                | 7/17/2006         | RSAT-S3        | -9.1       | 239      | 42                | 6/30/2006        | RSAT-S3        | -111.3     | 287      |
| 43                | 8/10/2006         | RSAT-S3        | 124.3      | 263      | 43                | 7/24/2006        | RSAT-S3        | 261.9      | 311      |
| 44                | 9/3/2006          | RSAT-S3        | 309.5      | 287      | 44                | 8/17/2006        | RSAT-S3        | -710.3     | 335      |
| 45                | 9/27/2006         | RSAT-S3        | -750.1     | 311      | 45                | 9/10/2006        | RSAT-S3        | 172.6      | 359      |
| 46                | 10/21/2006        | RSAT-S3        | 117.9      | 335      | 46                | 10/4/2006        | RSAT-S3        | -593.5     | 383      |
| 47                | 11/14/2006        | RSAT-S3        | -14.2      | 359      | 47                | 10/28/2006       | RSAT-S3        | -277.9     | 407      |
| 48                | 12/8/2006         | RSAT-S3        | -5.8       | 383      | 48                | 11/21/2006       | RSAT-S3        | 228.7      | 431      |
| 49                | 1/1/2007          | RSAT-S3        | 494.9      | 407      | 49                | 12/15/2006       | RSAT-S3        | -921.2     | 455      |
| 50                | 1/25/2007         | RSAT-S3        | -482.7     | 431      | 50                | 1/8/2007         | RSAT-S3        | 434.2      | 479      |
| 51                | 2/18/2007         | RSAT-S3        | 438.4      | 455      | 51                | 2/1/2007         | RSAT-S3        | -403.0     | 503      |
| 52                | 3/14/2007         | RSAT-S3        | -337.6     | 479      | 52                | 2/25/2007        | RSAT-S3        | -115.9     | 527      |
| 53                | 4/7/2007          | RSAT-S3        | -459.3     | 503      | 53                | 3/21/2007        | RSAT-S3        | -138.3     | 551      |
| 54                | 5/1/2007          | RSAT-S3        | 552.6      | 527      | 54                | 4/14/2007        | RSAT-S3        | -899.0     | 575      |
| 55                | 5/25/2007         | RSAT-S3        | -339.8     | 551      | 55                | 5/8/2007         | RSAT-S3        | 355.1      | 599      |
| 56                | 6/18/2007         | RSAT-S3        | 816.7      | 575      | 56                | 6/1/2007         | RSAT-S3        | -301.7     | 623      |

Table S4. LRA.

| Track 147         |                  |                |            |          | Track 247         |                  |                |            |          |
|-------------------|------------------|----------------|------------|----------|-------------------|------------------|----------------|------------|----------|
| Ascending Mode    |                  |                |            |          | Ascending Mode    |                  |                |            |          |
| # Scene           | Data             | Satellite      | Bn         | Bt       | # Scene           | Data             | Satellite      | Bn         | Bt       |
| 1                 | 3/7/2003         | RSAT-S3        | -678.0     | -863     | 1                 | 4/7/2003         | RSAT-S3        | -125.4     | -719     |
| 2                 | 3/31/2003        | RSAT-S3        | 387.8      | -839     | 2                 | 5/1/2003         | RSAT-S3        | 438.9      | -695     |
| 3                 | 5/18/2003        | RSAT-S3        | -117.9     | -791     | 3                 | 5/25/2003        | RSAT-S3        | 148.0      | -671     |
| 4                 | 6/11/2003        | RSAT-S3        | 223.9      | -767     | 4                 | 6/18/2003        | RSAT-S3        | -56.6      | -647     |
| 5                 | 7/5/2003         | RSAT-S3        | 678.2      | -743     | 5                 | 7/12/2003        | RSAT-S3        | 1027.3     | -623     |
| 6                 | 7/29/2003        | RSAT-S3        | 197.3      | -719     | 6                 | 8/5/2003         | RSAT-S3        | 271.9      | -599     |
| 7                 | 8/22/2003        | RSAT-S3        | -57.7      | -695     | 7                 | 8/29/2003        | RSAT-S3        | 28.8       | -575     |
| 8                 | 9/15/2003        | RSAT-S3        | 444.6      | -671     | 8                 | 9/22/2003        | RSAT-S3        | -11.7      | -551     |
| 9                 | 10/9/2003        | RSAT-S3        | 648.4      | -647     | 9                 | 10/16/2003       | RSAT-S3        | 137.4      | -527     |
| 10                | 11/2/2003        | RSAT-S3        | 428.5      | -623     | 10                | 11/9/2003        | RSAT-S3        | 331.2      | -503     |
| 11                | 11/26/2003       | RSAT-S3        | -226.8     | -599     | 11                | 12/3/2003        | RSAT-S3        | 365.5      | -479     |
| 12                | 12/20/2003       | RSAT-S3        | -70.4      | -575     | 12                | 12/27/2003       | RSAT-S3        | -259.0     | -455     |
| 13                | 1/13/2004        | RSAT-S3        | 747.3      | -551     | 13                | 1/20/2004        | RSAT-S3        | 60.0       | -431     |
| 14                | 2/6/2004         | RSAT-S3        | -167.5     | -527     | 14                | 2/13/2004        | RSAT-S3        | 247.5      | -407     |
| 15                | 4/18/2004        | RSAT-S3        | 446.0      | -455     | 15                | 4/1/2004         | RSAT-S3        | 31.2       | -359     |
| 16                | 7/23/2004        | RSAT-S3        | 191.8      | -359     | 16                | 7/6/2004         | RSAT-S3        | 655.9      | -263     |
| 17                | 8/16/2004        | RSAT-S3        | 283.4      | -335     | 17                | 7/30/2004        | RSAT-S3        | 618.3      | -239     |
| 18                | 9/9/2004         | RSAT-S3        | 205.3      | -311     | 18                | 8/23/2004        | RSAT-S3        | 350.2      | -215     |
| 19                | 10/3/2004        | RSAT-S3        | 797.7      | -287     | 19                | 9/16/2004        | RSAT-S3        | 57.3       | -191     |
| 20                | 10/27/2004       | RSAT-S3        | 95.3       | -263     | 20                | 10/10/2004       | RSAT-S3        | 341.3      | -167     |
| 21                | 11/20/2004       | RSAT-S3        | -267.9     | -239     | 21                | 11/3/2004        | RSAT-S3        | 359.3      | -143     |
| 22                | 12/14/2004       | RSAT-S3        | 655.7      | -215     | 22                | 11/27/2004       | RSAT-S3        | -344.9     | -119     |
| 23                | 1/7/2005         | RSAT-S3        | -354.2     | -191     | 23                | 12/21/2004       | RSAT-S3        | 573.8      | -95      |
| 24                | 1/31/2005        | RSAT-S3        | 354.2      | -167     | 24                | 1/14/2005        | RSAT-S3        | -334.5     | -71      |
| 25                | 2/24/2005        | RSAT-S3        | 159.9      | -143     | 25                | 2/7/2005         | RSAT-S3        | -91.2      | -47      |
| 26                | 3/20/2005        | RSAT-S3        | -137.1     | -119     | 26                | 3/3/2005         | RSAT-S3        | 767.9      | -24      |
| 27                | 4/13/2005        | RSAT-S3        | 299.3      | -95      | <b>27(master)</b> | <b>3/27/2005</b> | <b>RSAT-S3</b> | <b>0.0</b> | <b>0</b> |
| 28                | 5/7/2005         | RSAT-S3        | 22.4       | -71      | 28                | 4/20/2005        | RSAT-S3        | -170.1     | 24       |
| 29                | 5/31/2005        | RSAT-S3        | 56.8       | -47      | 29                | 5/14/2005        | RSAT-S3        | 480.5      | 47       |
| 30                | 6/24/2005        | RSAT-S3        | 72.8       | -23      | 30                | 6/7/2005         | RSAT-S3        | -212.8     | 71       |
| <b>31(master)</b> | <b>7/18/2005</b> | <b>RSAT-S3</b> | <b>0.0</b> | <b>0</b> | 31                | 7/1/2005         | RSAT-S3        | 517.6      | 95       |
| 32                | 8/11/2005        | RSAT-S3        | -9.9       | 23       | 32                | 7/25/2005        | RSAT-S3        | -367.9     | 119      |
| 33                | 9/4/2005         | RSAT-S3        | -132.3     | 47       | 33                | 8/18/2005        | RSAT-S3        | 720.5      | 143      |
| 34                | 9/28/2005        | RSAT-S3        | 1037.3     | 71       | 34                | 9/11/2005        | RSAT-S3        | -316.1     | 167      |
| 35                | 10/22/2005       | RSAT-S3        | -269.7     | 95       | 35                | 10/29/2005       | RSAT-S3        | 6.6        | 215      |
| 36                | 11/15/2005       | RSAT-S3        | 614.6      | 119      | 36                | 11/22/2005       | RSAT-S3        | -25.4      | 239      |
| 37                | 12/9/2005        | RSAT-S3        | 57.5       | 143      | 37                | 1/9/2006         | RSAT-S3        | -100.4     | 287      |
| 38                | 1/2/2006         | RSAT-S3        | -132.1     | 167      | 38                | 2/2/2006         | RSAT-S3        | -217.2     | 311      |
| 39                | 1/26/2006        | RSAT-S3        | 440.5      | 191      | 39                | 2/26/2006        | RSAT-S3        | 378.5      | 335      |
| 40                | 2/19/2006        | RSAT-S3        | -190.0     | 215      | 40                | 3/22/2006        | RSAT-S3        | -492.4     | 359      |
| 41                | 3/15/2006        | RSAT-S3        | -306.4     | 239      | 41                | 4/15/2006        | RSAT-S3        | 499.3      | 383      |
| 42                | 5/2/2006         | RSAT-S3        | -155.1     | 287      | 42                | 5/9/2006         | RSAT-S3        | 4.9        | 407      |

**Table S4. Cont.**

| <b>Track 147</b>      |             |                  |           |           | <b>Track 247</b>      |             |                  |           |           |
|-----------------------|-------------|------------------|-----------|-----------|-----------------------|-------------|------------------|-----------|-----------|
| <b>Ascending Mode</b> |             |                  |           |           | <b>Ascending Mode</b> |             |                  |           |           |
| <b># Scene</b>        | <b>Data</b> | <b>Satellite</b> | <b>Bn</b> | <b>Bt</b> | <b># Scene</b>        | <b>Data</b> | <b>Satellite</b> | <b>Bn</b> | <b>Bt</b> |
| 43                    | 5/26/2006   | RSAT-S3          | 519.0     | 311       | 43                    | 6/2/2006    | RSAT-S3          | −49.1     | 431       |
| 44                    | 6/19/2006   | RSAT-S3          | −196.4    | 335       | 44                    | 6/26/2006   | RSAT-S3          | 202.9     | 455       |
| 45                    | 7/13/2006   | RSAT-S3          | 749.5     | 359       | 45                    | 7/20/2006   | RSAT-S3          | 109.5     | 479       |
| 46                    | 8/6/2006    | RSAT-S3          | −67.2     | 383       | 46                    | 8/13/2006   | RSAT-S3          | 280.3     | 503       |
| 47                    | 8/30/2006   | RSAT-S3          | −215.2    | 407       | 47                    | 9/6/2006    | RSAT-S3          | −347.7    | 527       |
| 48                    | 9/23/2006   | RSAT-S3          | 347.7     | 431       | 48                    | 9/30/2006   | RSAT-S3          | 555.2     | 551       |
| 49                    | 10/17/2006  | RSAT-S3          | −180.7    | 455       | 49                    | 10/24/2006  | RSAT-S3          | −71.7     | 575       |
| 50                    | 11/10/2006  | RSAT-S3          | 250.2     | 479       | 50                    | 11/17/2006  | RSAT-S3          | −95.6     | 599       |
| 51                    | 12/4/2006   | RSAT-S3          | 59.3      | 503       | 51                    | 12/11/2006  | RSAT-S3          | 408.8     | 623       |
| 52                    | 12/28/2006  | RSAT-S3          | −156.4    | 527       | 52                    | 1/4/2007    | RSAT-S3          | −411.3    | 647       |
| 53                    | 1/21/2007   | RSAT-S3          | 113.1     | 551       | 53                    | 1/28/2007   | RSAT-S3          | 682.2     | 671       |
| 54                    | 2/14/2007   | RSAT-S3          | −424.3    | 575       | 54                    | 2/21/2007   | RSAT-S3          | −467.2    | 695       |
| 55                    | 3/10/2007   | RSAT-S3          | 349.5     | 599       | 55                    | 3/17/2007   | RSAT-S3          | −54.9     | 719       |
| 56                    | 4/3/2007    | RSAT-S3          | 117.2     | 623       | 56                    | 4/10/2007   | RSAT-S3          | 570.8     | 743       |
| 57                    | 4/27/2007   | RSAT-S3          | −275.0    | 647       | 57                    | 5/4/2007    | RSAT-S3          | −433.1    | 767       |
| 58                    | 5/21/2007   | RSAT-S3          | 267.7     | 671       | 58                    | 5/28/2007   | RSAT-S3          | 904.6     | 791       |
| 59                    | 6/14/2007   | RSAT-S3          | −296.0    | 695       | 59                    | 6/21/2007   | RSAT-S3          | −542.2    | 815       |

© 2013 by the authors; licensee MDPI, Basel, Switzerland. This article is an open access article distributed under the terms and conditions of the Creative Commons Attribution license (<http://creativecommons.org/licenses/by/3.0/>).
